# Supplementary material for: Relative Clinical Efficacy and Safety of Second- or Later-Line Treatments for Advanced and Metastatic Gastric Cancer: A Rapid Review and Network Meta-Analysis
Source: Research Square preprint supplement (doi:10.21203/rs.3.rs-7120453/v1), 2025-07-24

**Table 1: PICOS framework**

| Review Question: What are the published randomised controlled trials of systemic treatments for advanced and metastatic gastric cancer in the second- or later-line setting? | |
| --- | --- |
| Population | Individuals with a diagnosis of advanced or metastatic gastric cancer in the second- or later-line setting. |
| Intervention | All systemic treatments approved by both ESMO (Lordick et al., 2022) and NCCN Guidelines (Ajani et al., 2022) and that are also aligned with Expert Clinical opinion.  Studies evaluating at least one of the following treatments:   - Paclitaxel - Docetaxel - Irinotecan - FOLFIRI - Ramucirumab - Ramucirumab + Paclitaxel - Pembrolizumab - Trastuzumab deruxtecan (for HER2 overexpression-positive adenocarcinoma) - DostarlimabEntrectinib - trifluridine-tipiracil - Best supportive care |
| Comparator | Unrestricted |
| Outcomes | Overall survival, progression-free survival, overall response rate, Grade ≥ 3 Treatment-related adverse events |
| Study design | randomised controlled trials |
| Exclusion criteria | Studies in first-line treatment for advanced and metastatic gastric cancer, conference papers, commentaries, abstracts, and letters, where the full paper was unobtainable.  Subgroup, exploratory and post-hoc analysis of original trials. |
| Language | English only |
| Time period | 2009 to 29 May 2024 |

*ESMO: European Society for Medical Oncology; NCCN: National Comprehensive Cancer Network

**Fig 1: PRISMA flow chart**


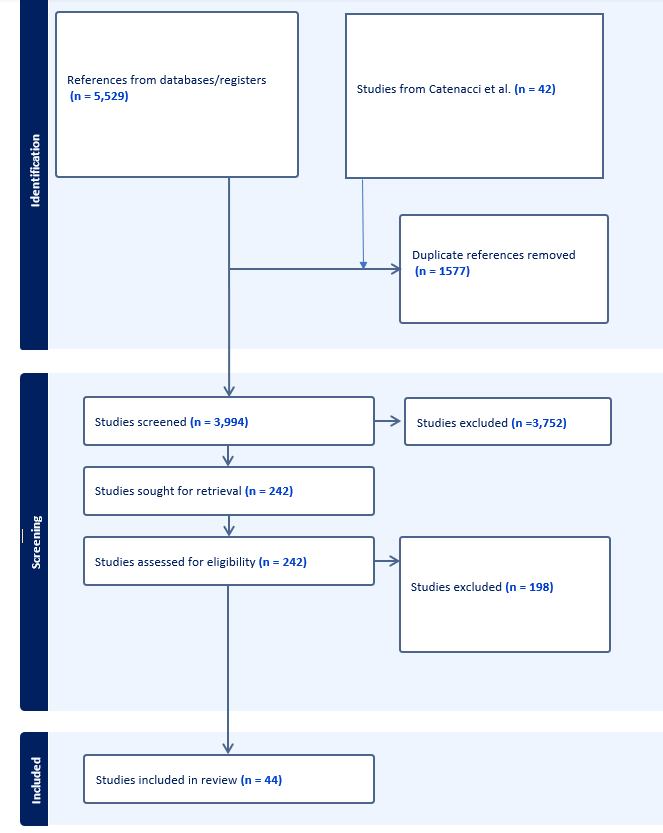


Fig 2: Bayesian Network Meta-Analysis of Overall Survival


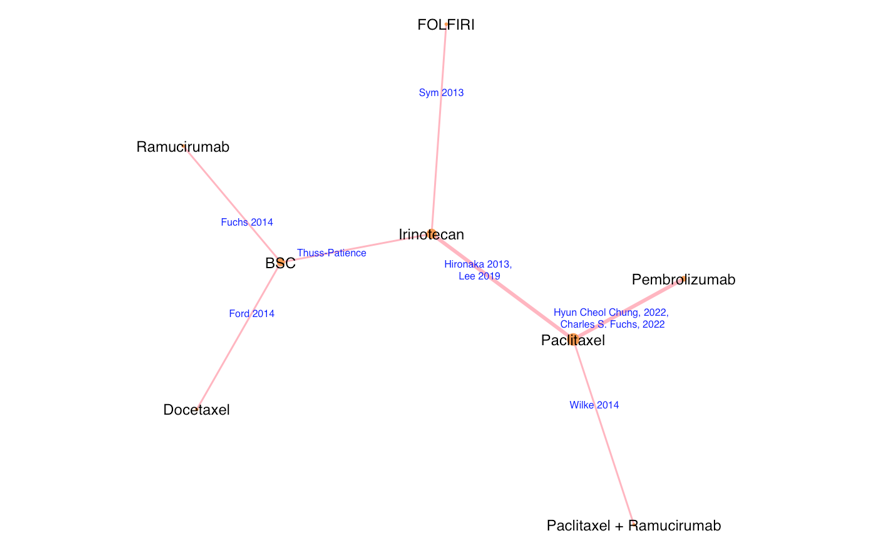

Fig 3: Bayesian Network Meta-Analysis of Progression Free Survival


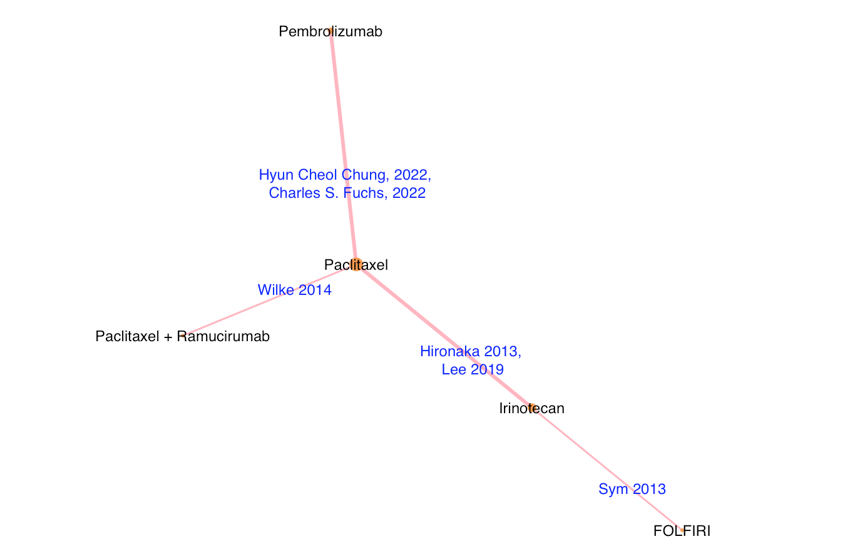


Fig 4: Bayesian Network Meta-Analysis of Objective Response Rate


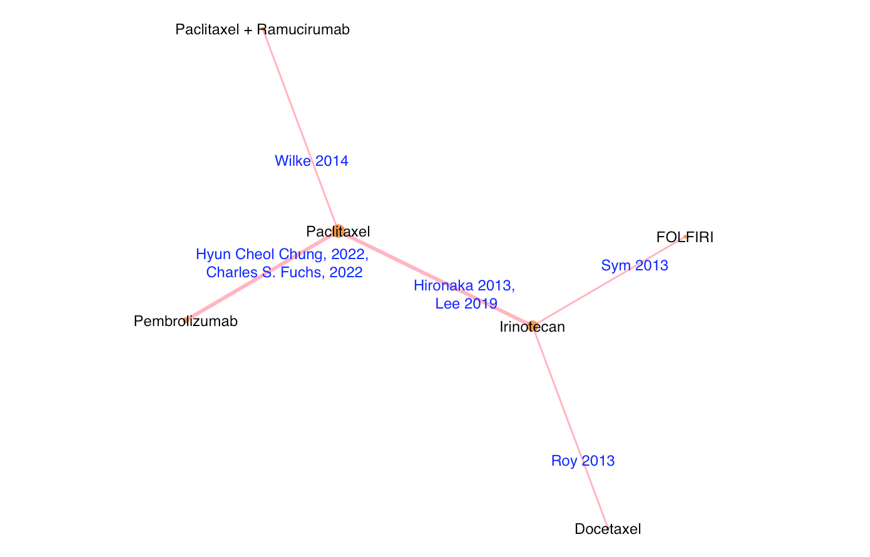


Fig 5: Bayesian Network Meta-Analysis of Grade ≥ 3 TRAEs


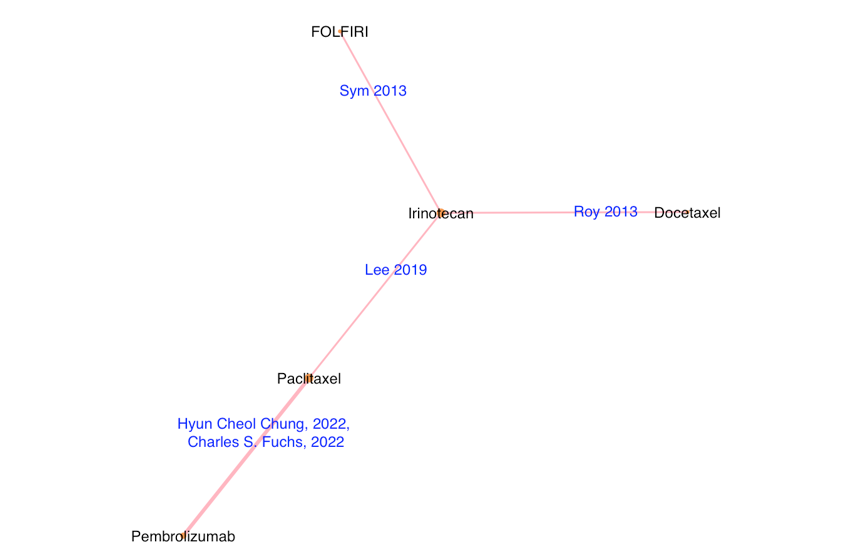


**Fig 6: Flow chart depicting the process of exclusion and final inclusion of studies in the OS network**


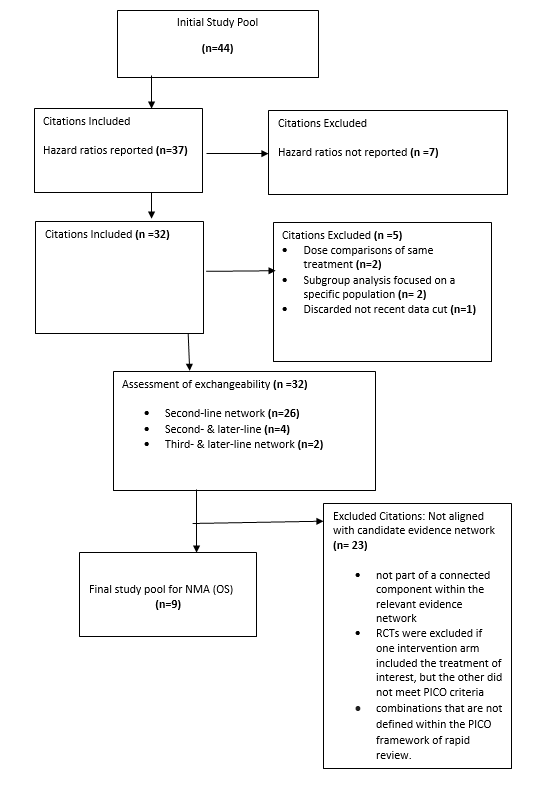


**Fig 7: Flow chart depicting the process of exclusion and final inclusion of studies in the PFS network**


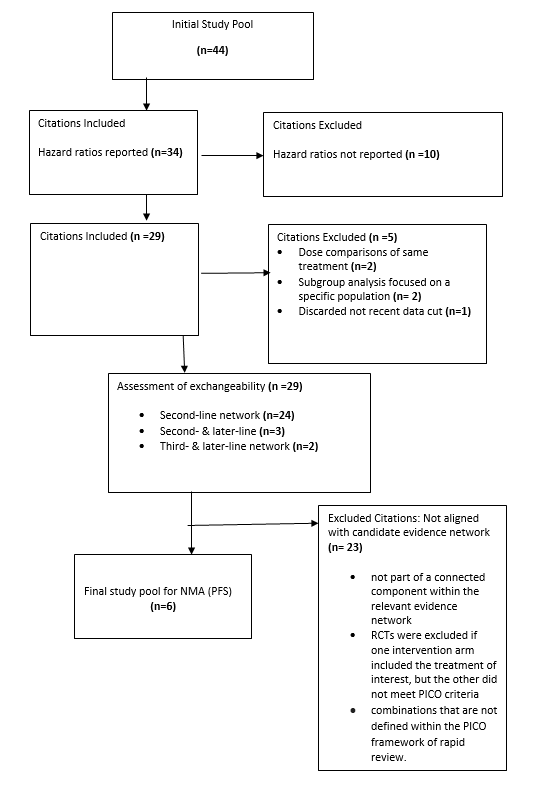


**Fig 8: Flow chart depicting the process of exclusion and final inclusion of studies in the ORR network**


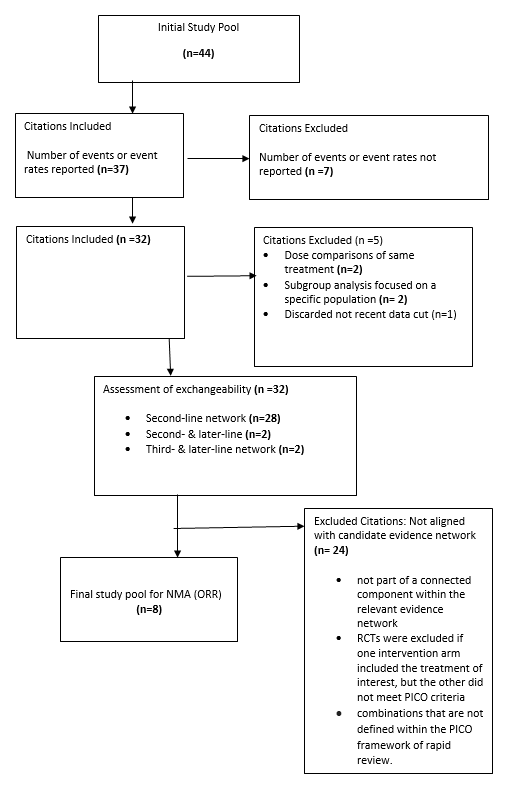


**Fig 9: Flow chart depicting the process of exclusion and final inclusion of studies in the Grade ≥ TRAEs network**


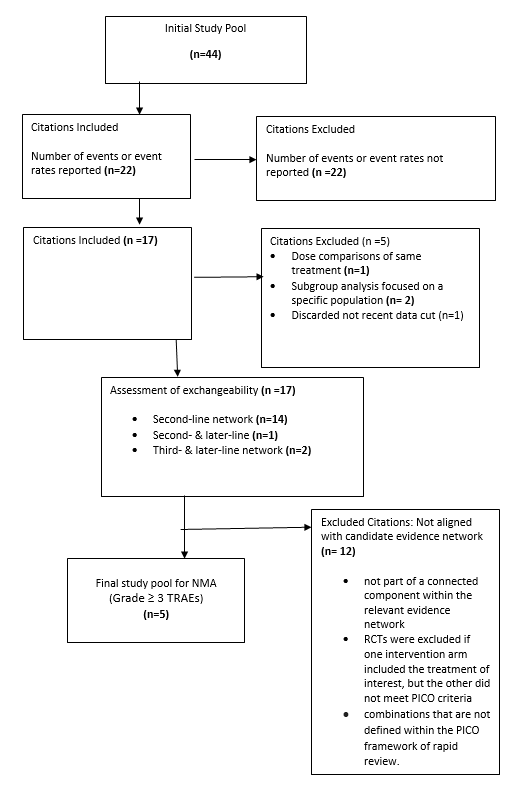

Supplement: Supplementary file 1 [file c4a6563ccb7e0844c7b08821.docx]
